# Supplementary material for: Guanidine production by plant homoarginine-6-hydroxylases
Source: eLife journal article supplement (doi:10.7554/elife.91458), 2023-10-11

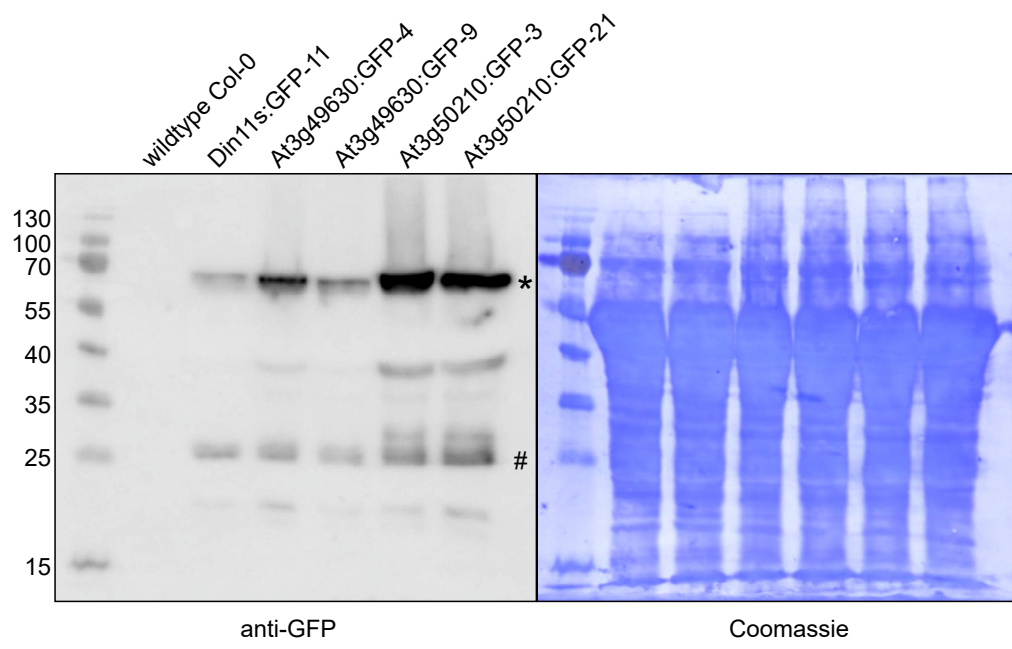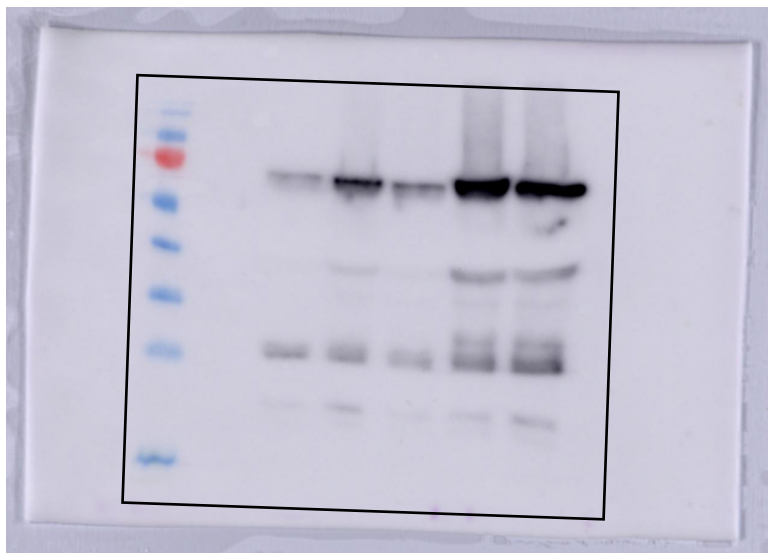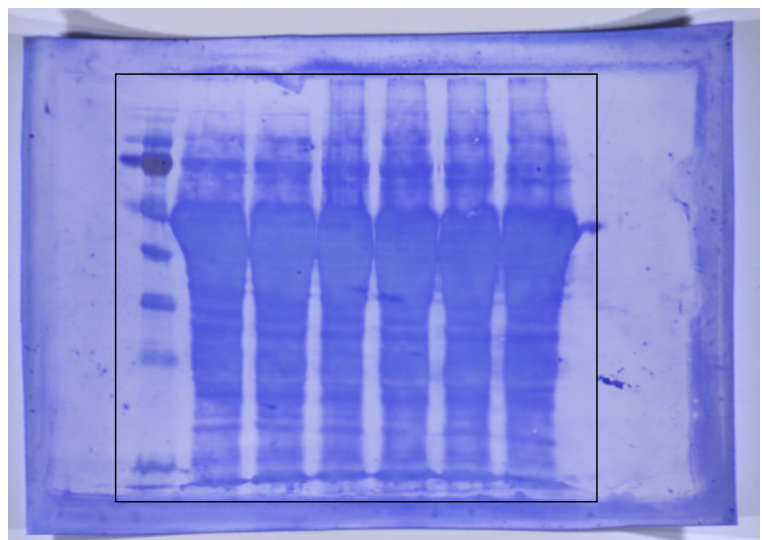

Supplement: fig4-figsupp1-data2 [file elife-91458-fig4-figsupp1-data2-v1.pdf]
