# Supplementary material for: Guanidine production by plant homoarginine-6-hydroxylases
Source: eLife. 2024 Apr 15;12:RP91458. doi: 10.7554/eLife.91458 (PMC11018352; doi:10.7554/eLife.91458)
Supplement: Figure 2—figure supplement 1—source data 1. [file elife-91458-fig2-figsupp1-data1.xlsx]

## Sheet: Tabelle1
Suppl. Fig. S4a
condition	Gd	Average	SD
ctrl	327.788
ctrl	355.112	340.461	13.7687
ctrl	338.485
Arg	459.705
Arg	463.857	472.513	18.7043
Arg	493.978
aKG	322.56
aKG	331.808	325.934	5.10595
aKG	323.434
Arg+aKG	459.439
Arg+aKG	456.909	459.305	2.33213
Arg+aKG	461.567
Suppl. Fig. S4b				Average	Average
sample		Gd	pipecolate	Gd	Pip	SD Gd	SD Pip
Gm 2-ODD-C23_1	cells	281.62	5328.71
Gm 2-ODD-C23_2	cells	257.978	5386.67	285.108	5803.99	29.0327	773.56
Gm 2-ODD-C23_3	cells	315.728	6696.6
Gm 2-ODD-C23_1	medium	251.247	100.063
Gm 2-ODD-C23_2	medium	247.742	103.617	269.063	115.416	33.9389	23.5825
Gm 2-ODD-C23_3	medium	308.2	142.57
