# Supplementary material for: Guanidine production by plant homoarginine-6-hydroxylases
Source: eLife. 2024 Apr 15;12:RP91458. doi: 10.7554/eLife.91458 (PMC11018352; doi:10.7554/eLife.91458)
Supplement: Figure 2—source data 1. [file elife-91458-fig2-data1.xlsx]

## Sheet: 221019
							Average			Stdev
strain	condition	Gd	pipecolate			Guanidine	Gd, no HoArg	Gd, 1 mM HoArg	Pipecolate	Gd, no HoArg	Gd, 1 mM HoArg	Pipecolate
pET24-HT-1	no HoArg	4.82092				pET24	6.27037	6.61556	0.000227531	2.27058	0.443477	7.49174e-05
pET24-HT-2	no HoArg	5.80299				Din11L	5.96295	6.43535	0.000217355	0.384309	0.685117	3.45189e-05
pET24-HT-3	no HoArg	9.60682				Din11s	269.489	484.679	299.079	4.67956	8.88542	14.8585
pET24-HT-4	no HoArg	4.85077				At3g49630	7.8266	212.924	219.471	0.720803	58.3565	61.8652
pET24-Din11L-1	no HoArg	18.3795		excluded		At3g50210	11.9456	489.946	481.103	1.46757	69.693	62.4305
pET24-Din11L-2	no HoArg	5.6912				Gm 2-ODD-C23	12.1723	477.718	467.561	1.7584	4.21204	9.27619
pET24-Din11L-3	no HoArg	6.23469				Os 2-ODD-C23	5.54172	358.393	365.991	0.950399	8.49665	17.1128
pET24-Din11s-1	no HoArg	274.846				Ava5009	7.78473	12.4137	0.000218423	2.36801	2.09162	2.3678e-05
pET24-Din11s-2	no HoArg	266.2
pET24-Din11s-3	no HoArg	267.42
pET24-At3g49630-1	no HoArg	8.63793
pET24-At3g49630-2	no HoArg	7.26011
pET24-At3g49630-3	no HoArg	7.58177
pET24-At3g50210-1	no HoArg	12.888
pET24-At3g50210-3	no HoArg	10.2547
pET24-At3g50210-2	no HoArg	12.6941
pET24-GmODD33-1	no HoArg	14.2027
pET24-GmODD33-2	no HoArg	11.1525
pET24-GmODD33-3	no HoArg	11.1617
pET24-OsODD33-1	no HoArg	5.48991
pET24-OsODD33-2	no HoArg	4.61829
pET24-OsODD33-3	no HoArg	6.51697
Ava5009-1	no HoArg	5.77419
Ava5009-2	no HoArg	10.3949
Ava5009-3	no HoArg	7.18506
pET24-HT-1	1 mM HoArg	6.79806	0.000327354
pET24-HT-2	1 mM HoArg	6.37199	0.000178937
pET24-HT-3	1 mM HoArg	7.14385	0.000241912
pET24-HT-4	1 mM HoArg	6.14835	0.000161919
pET24-Din11L-1	1 mM HoArg	6.47907	0.000256376
pET24-Din11L-2	1 mM HoArg	5.72942	0.000190801
pET24-Din11L-3	1 mM HoArg	7.09756	0.000204889
pET24-Din11s-1	1 mM HoArg	494.851	310.055
pET24-Din11s-2	1 mM HoArg	480.754	305.012
pET24-Din11s-3	1 mM HoArg	478.433	282.171
pET24-At3g49630-1	1 mM HoArg	177.404	181.576
pET24-At3g49630-2	1 mM HoArg	181.093	185.975
pET24-At3g49630-3	1 mM HoArg	280.275	290.862
pET24-At3g50210-1	1 mM HoArg	522.27	530.051
pET24-At3g50210-2	1 mM HoArg	537.607	502.461
pET24-At3g50210-3	1 mM HoArg	409.96	410.796
pET24-GmODD33-1	1 mM HoArg	482.45	465.856
pET24-GmODD33-2	1 mM HoArg	476.325	477.571
pET24-GmODD33-3	1 mM HoArg	474.379	459.256
pET24-OsODD33-1	1 mM HoArg	348.659	354.427
pET24-OsODD33-2	1 mM HoArg	364.326	357.897
pET24-OsODD33-3	1 mM HoArg	362.193	385.65
Ava5009-1	1 mM HoArg	14.7115	0.000191371
Ava5009-2	1 mM HoArg	11.9092	0.000228515
Ava5009-3	1 mM HoArg	10.6206	0.000235382
					Pip
