# Supplementary material for: Guanidine production by plant homoarginine-6-hydroxylases
Source: eLife. 2024 Apr 15;12:RP91458. doi: 10.7554/eLife.91458 (PMC11018352; doi:10.7554/eLife.91458)
Supplement: Figure 3—source data 1. [file elife-91458-fig3-data1.xlsx]

## Sheet: Tabelle1
Din11s
c homoarginine	HoArg	HoArg +1 mM Arg	HoArg + 1 mM Can	Arg
20	12.0443	11.6627	9.8265	2.08476
15	11.8439	11.4395	9.15227	1.99704
10	11.5339	10.4538	8.58479	1.98631
5	10.2198	8.23471	6.6549	1.284
3	8.4349	5.91859	4.80368
2	7.22384	4.62096	3.27093	0.977915
1	4.76244	3.18476	2.04067
0.5	3.05571	1.98596	1.25938
7.5				1.56983
30				2.61035
40				2.94209
60				2.93853
At3g49630
c homoarginine	HoArg	HoArg +1 mM Arg	HoArg + 1 mM Can
0	0.15
0.5	0.58	0.57	0.55
1	1.03	1.01	1
2	1.73	1.77	1.7
3	2.26	2.32	2.12
5	3.07	2.94	2.9
7.5	3.62	3.31	3.64
10	3.66	4.03	3.93
15	4.57	4.53	4.39
20	4.77	4.79	4.65
At3g50210
c homoarginine	HoArg	HoArg +1 mM Arg	HoArg + 1 mM Can
0.3	5.65729	2.43584	5.71089
0.5	9.3157	5.42237	7.22215
1	13.1245	8.46367	9.75799
2	16.1755	12.5661	11.682
3	16.8042	14.1453	12.3684
5	18.8185	16.3042	13.4034
10	19.5808	18.3873	15.1671
15	19.7699	18.96	15.2785
7.5	19.2349	17.7954	14.9476
7.5	19.3565	17.9898	14.9444
20	19.0398	19.4199	16.849
