# Supplementary material for: Guanidine production by plant homoarginine-6-hydroxylases
Source: eLife. 2024 Apr 15;12:RP91458. doi: 10.7554/eLife.91458 (PMC11018352; doi:10.7554/eLife.91458)
Supplement: Figure 5—figure supplement 1—source data 1. [file elife-91458-fig5-figsupp1-data1.xlsx]

## Sheet: Tabelle1
Arabidopsis seedlings +0.2 mM homoarginine
MS-Nr	plant	Gd (µM)	average	SD
M49	triple-KO-1-1	29.6274
M50	triple-KO-1-2	29.5133
M51	triple-KO-1-3	31.6591
M52	triple-KO-1-4	27.1847	29.4961	1.82926
M53	triple-KO-2-1	32.1972
M54	triple-KO-2-2	26.9642
M55	triple-KO-2-3	33.7324
M56	triple-KO-2-4	34.4809	31.8437	3.38905
M69	din11-2-1	154.171
M70	din11-2-2	146.389
M71	din11-2-3	145.129
M72	din11-2-4	160.726	151.604	7.27837
M73	din11-1-1	126.341
M74	din11-1-2	136.596
M75	din11-1-3	156.542
M76	din11-1-4	134.642	138.53	12.8044
M77	SALK_095112-1	162.781
M78	SALK_095112-2	124.421
M79	SALK_095112-3	166.09
M80	SALK_095112-4	185.295	159.647	25.4956
M81	SAIL_512_A07-1	143.139
M82	SAIL_512_A07-2	137.73
M83	SAIL_512_A07-3	184.569
M84	SAIL_512_A07-4	144.033	152.368	21.6476
M85	SALK_133126-1	42.3432
M86	SALK_133126-2	31.0583
M87	SALK_133126-3	36.4106
M88	SALK_133126-4	34.993	36.2013	4.67892
M89	SALK_090742-1	43.4722
M90	SALK_090742-2	40.7167
M91	SALK_090742-3	38.8405
M92	SALK_090742-4	36.8009	39.9576	2.83673
M93	Col-0-1	122.873
M94	Col-0-2	119.313
M95	Col-0-3	148.376
M96	Col-0-4	118.307	127.217	14.241
