# Supplementary material for: Guanidine production by plant homoarginine-6-hydroxylases
Source: eLife. 2024 Apr 15;12:RP91458. doi: 10.7554/eLife.91458 (PMC11018352; doi:10.7554/eLife.91458)
Supplement: Figure 5—figure supplement 2—source data 1. [file elife-91458-fig5-figsupp2-data1.xlsx]

## Sheet: Fig. S9data
Plant	sample	Gd (ug/g)	average	SD
Robinia	seeds	98.6538
Robinia	seeds	141.963	145.533	48.7623
Robinia	seeds	195.982
Robinia	young leaves	8.77042
Robinia	young leaves	4.13676	5.35338	2.99985
Robinia	young leaves	3.15296
Alfalfa	seeds	12.7109
Alfalfa	seeds	11.9979	11.8331	0.970721
Alfalfa	seeds	10.7905
Alfalfa	imbibied seeds	15.1236
Alfalfa	imbibied seeds	9.18513	11.2988	3.31842
Alfalfa	imbibied seeds	9.58784
Alfalfa	24 h	39.8092
Alfalfa	24 h	38.4581	38.7997	0.889315
Alfalfa	24 h	38.1319
Alfalfa	70 h	61.1685
Alfalfa	70 h	69.0828	70.5977	10.2707
Alfalfa	70 h	81.5417
Alfalfa	198 h	84.8434
Alfalfa	198 h	82.1789	84.8101	2.6147
Alfalfa	198 h	87.408
Broccoli	seeds	2.19201
Broccoli	seeds	1.90175	2.19002	0.287271
Broccoli	seeds	2.47628
Broccoli	24 h	12.9804
Broccoli	24 h	9.61542	12.2472	2.35254
Broccoli	24 h	14.1459
Broccoli	70 h	17.8537
Broccoli	70 h	15.0804	15.8492	1.75163
Broccoli	70 h	14.6134
Rucola	seeds	1.39876
Rucola	seeds	1.58705	1.53967	0.124195
Rucola	seeds	1.63321
Rucola	24 h	3.88415
Rucola	24 h	3.1252	3.82943	0.678526
Rucola	24 h	4.47894
Rucola	70 h	3.41023
Rucola	70 h	4.51075	4.1198	0.615572
Rucola	70 h	4.43844
Arabidopsis	leaves	10.0698
Arabidopsis	leaves	3.9721	7.43184	3.1308
Arabidopsis	leaves	8.25365
