# Supplementary material for: Guanidine production by plant homoarginine-6-hydroxylases
Source: eLife. 2024 Apr 15;12:RP91458. doi: 10.7554/eLife.91458 (PMC11018352; doi:10.7554/eLife.91458)
Supplement: Figure 5—figure supplement 3—source data 1. [file elife-91458-fig5-figsupp3-data1.xlsx]

## Sheet: Tabelle1
Control A+B											Root length				SD
Plant	Col-0_1	Col-0_2	Din11s:GFP_1	Din11s:GFP_2	50210:GFP_1	50210:GFP_2	triple-KO-1_1	triple-KO-1_2			Col-0	Din11s:GFP	At3g50210:GFP	triple-KO-1	Col-0	Din11s:GFP	At3g50210:GFP	triple-KO-1
1	1.93286	2.57239	1.76471	2.26449	1.81112	1.94846	1.61977	2.02537		ctrl	2.0878	2.02981	2.01132	2.00176	0.297556	0.212555	0.306132	0.213523
2	2.13005	1.49672	2.10774	1.52519	2.10542	1.3816	2.0733	2.06547		1 mM Arg	0.997213	0.94432	0.912176	0.918581	0.17921	0.199098	0.171877	0.163112
3	2.18321	2.28373	2.2686	1.90369	2.22257	2.04514	1.50172	2.02241		0.1 mM HoArg	1.15244	1.22445	1.15011	1.13122	0.280556	0.278304	0.212352	0.197838
4	1.86518	2.3005	2.00113	1.88793	1.95899	2.18744	1.89457	2.02396
5	2.3085	2.36795	1.49741	1.7582	2.40195	2.37741	2.15978	1.55296
6	2.23048	2.15087	2.17138	2.17571	1.98551	1.84842	2.03973	2.06051
7	2.15482	2.18744	2.28689	2.1745	1.84598	1.90757	2.00037	2.01549
8	1.9886	2.37334	1.87358	2.32421	1.56463	1.81321	2.14765	2.5366
9	1.98569			1.89448	1.96794	2.07324	2.12574	2.38896
10	1.68268					1.51487		1.98369
11	1.97538	2.4245	1.99023	2.02223	1.44532		1.97158	1.9614
12	2.17668	1.60362	2.18949	2.27507	2.14262	2.18344	1.54828	2.0106
13	1.47691	1.98391	1.94832	1.86658	2.34857	2.7063	1.75129	1.88682
14	2.26773	2.14074	2.02929	1.92009	1.94166	1.64136	1.94011	2.23895
15	1.3288	2.42204	2.12503	2.033	1.97555	2.1857	1.92938	2.06914
16	2.20223	2.09114	2.22833	1.99897	2.09607	2.45605	1.94269	2.20555
17	1.66786	2.54835	2.025	2.13107	1.99042	2.42494	2.24409	2.08689
18	2.07315	2.09876	1.62828	2.3268	1.92177	2.42446	1.79166	2.27532
19	2.15221	1.89537	2.24935	2.216	1.45088	1.82145	1.90643	2.03987
20	2.50377	2.10809	1.95456	2.06552	2.08146	2.2306	1.92857	2.10206
1 mM Arg A+B
Plant	Col-0_1	Col-0_2	Din11s:GFP_1	Din11s:GFP_2	50210:GFP_1	50210:GFP_2	triple-KO-1_1	triple-KO-1_2
1	1.37758	1.22353	0.674937	0.95342	0.941223	0.908654	0.91679	0.723952
2	1.05426	0.565123	1.07375	0.994184	0.82813	0.624849	0.920575	0.944454
3	0.965307	0.799704	0.770758	1.08137	0.776778	1.48809	0.949354	0.781806
4	1.06285	0.932985	0.981974	1.04739	0.90618	0.82048	1.12414	0.799206
5	1.14752	0.759008	0.911434	0.973745	0.795991	1.09341	0.91077	0.604725
6	1.18316	0.846198	0.935092	0.575753	1.20242	0.951832	1.23109	1.19982
7	1.09468	0.974724	0.830229	0.798435	1.1079	0.80162	1.13247	0.896274
8	1.09418	0.929336	1.19844	0.826104	0.779111	1.13426	0.999502	1.11815
9	1.50726		0.911553	0.840613	0.743004	1.14163	0.916768	0.915968
10	1.06601			0.567826	0.855305	0.629243	1.02984	0.977713
11	1.00881	0.942473	1.07219	0.881163	0.99607	0.987072	0.838953	0.688381
12	1.05368	0.941083	0.878233	0.734162	1.03836	0.703578	0.81922	1.04638
13	1.04922	0.927417	1.1418	1.38976	0.787176	1.06373	1.27561	0.936461
14	0.967296	0.880211	0.81703	0.897823	0.659186	0.802203	0.879756	0.783528
15	1.07	0.858695	1.37343	1.0991	0.82274	0.740681	0.958299	0.885126
16	1.00846	0.7101	0.943987	1.24165	0.871707	0.848457	1.0841	0.860422
17	1.04714	0.868547	0.682921	0.98831	1.12736	0.84881	0.950373	1.05792
18	1.27683	0.92839	1.16466	1.15011	0.963363	0.972224	0.910655	0.587531
19	0.85702	0.824905	0.592268	0.846186	0.90352	0.93433	0.586919	0.758875
20	1.17516	0.915222	1.11272	0.873994	0.94502	0.941321	0.836483	0.904881
0.1 mM HoArg A+B
Plant	Col-0_1	Col-0_2	Din11s:GFP_1	Din11s:GFP_2	50210:GFP_1	50210:GFP_2	triple-KO-1_1	triple-KO-1_2
1	0.78285	1.43658	1.28422	1.24719	1.09449	1.05487	1.2068	0.860265
2	0.99515	1.24278	1.17045	1.38851	1.38436	1.08529	1.19854	1.28873
3	1.35445	1.20601	1.32467	1.48182	1.19629	1.36526	1.15372	1.02995
4	1.16743	1.19884	1.5617	1.08533	1.24845	0.99099	0.909015	0.894042
5	0.969906	0.807509	1.39693	1.00655	1.44317	1.36878	0.761774	0.770854
6	1.49478	0.90793	1.26254	1.22178	1.03068	1.19159	1.37517	1.22368
7	1.01122	1.01805	1.53323	1.17475	0.920575	1.22312	1.20861	1.14577
8	0.859799	0.80267	1.44601	0.990576	0.826531	0.874238	1.19489	1.26021
9	1.00761	0.542646	0.849276	0.998507	1.04953	1.34154	1.21046	1.306
10	1.55035	0.542445	0.774971	0.563294			0.706883	1.51284
11	1.22989	1.36323	1.44685	0.97993	0.779934	1.47587	0.956491	1.09023
12	1.35543	1.47464	1.18319	1.28923	0.764273	1.52722	0.974352	1.10667
13	0.817015	1.56229	0.947662	1.5919	1.00694	0.962745	1.10383	1.25493
14	1.50973	0.921244	0.876701	1.50089	1.50836	1.18299	1.2544	1.1908
15	1.1774	0.844484	1.11239	1.63974	0.875544	1.42815	1.17459	1.05526
16	1.30397	1.50253	1.35356	0.98159	0.970361	1.41722	1.25678	1.18903
17	1.34042	1.4637	1.42476	1.52324	1.23201	1.11063	0.787236	1.38007
18	1.32995	1.41203	1.02892	0.925792	1.27378	0.992273	0.914866	1.4587
19	0.870246	1.4054	1.32379	1.6256	1.05588	1.16534	1.34518	1.38722
20	1.19016	1.12482	0.753683	1.70619	1.13466		1.01639	1.13366
