# Supplementary material for: Guanidine production by plant homoarginine-6-hydroxylases
Source: eLife. 2024 Apr 15;12:RP91458. doi: 10.7554/eLife.91458 (PMC11018352; doi:10.7554/eLife.91458)
Supplement: Figure 5—source data 1. [file elife-91458-fig5-data1.xlsx]

## Sheet: Tabelle1
Plant	plate	time/d	Gd (µM)= (nmol/mg Fw)	HoArg (µM)	Gd	HoArg	SD Gd	SD HoArg
Col-0	ctrl	0	18.814	28.8786
Col-0	ctrl	0	16.9894	30.8386
Col-0	ctrl	0	18.1477	17.0385	17.9837	22.2124	0.923287	9.09224
Col-0	ctrl	0	17.1181	12.0937
Ko^3-A1	ctrl	0	8.01207	6.0819
Ko^3	ctrl	0	7.29965	5.68551
Ko^3	ctrl	0	7.06878	5.0962	7.46017	5.51916	0.491701	0.453494
Ko^3	ctrl	0	29.9313	5.21301
50210:GFP-3	ctrl	0	30.2802	3.3724
50210:GFP-3	ctrl	0	21.6952	2.50207
50210:GFP-3	ctrl	0	19.2843	2.65178	23.7532	2.90565	5.77965	0.400647
50210:GFP-3	ctrl	0	22.1231	3.09635
Col-0	HoArg	3	45.9187	369.18
Col-0	HoArg	3	42.599	237.691
Col-0	HoArg	3	47.1571	243.973	45.2249	295.178	2.3569	64.8241
Col-0	HoArg	3	53.7356	329.87
Ko^3	HoArg	3	15.6391	301.789
Ko^3	HoArg	3	13.862	167.83
Ko^3	HoArg	3	15.3805	130.214	14.9605	183.253	0.960076	80.8475
Ko^3	HoArg	3	17.8992	133.181
50210:GFP-3	HoArg	3	125.235	155.516
50210:GFP-3	HoArg	3	126.071	315.752
50210:GFP-3	HoArg	3	100.574	172.019	117.293	211.295	14.4853	72.2348
50210:GFP-3	HoArg	3	91.8032	201.894
Col-0	HoArg	5	63.7881	501.843
Col-0	HoArg	5	56.2267	477.313
Col-0	HoArg	5	71.0204	404.366	63.6784	490.96	7.39748	72.5435
Col-0	HoArg	5	69.9093	580.316
Ko^3	HoArg	5	19.8172	358.828
Ko^3	HoArg	5	19.6698	344.309
Ko^3	HoArg	5	18.3612	451.75	19.2828	348.339	0.801491	87.3529
Ko^3	HoArg	5	16.264	238.469
50210:GFP-3	HoArg	5	158.719	316.76
50210:GFP-3	HoArg	5	174.113	327.095
50210:GFP-3	HoArg	5	163.331	395.868	165.388	395.99	7.90053	104.883
50210:GFP-3	HoArg	5	191.414	544.238
Col-0	HoArg	7	90.1472	654.618
Col-0	HoArg	7	89.0733	507.563
Col-0	HoArg	7	70.5536	770.395	83.258	634.621	11.0155	109.244
Col-0	HoArg	7	78.5459	605.908
Ko^3	HoArg	7	20.8944	765.616
Ko^3	HoArg	7	17.81	510.408
Ko^3	HoArg	7	692.275	507.699	19.3522	583.006	2.18104	123.143
Ko^3	HoArg	7	83.378	548.299
50210:GFP-3	HoArg	7	227.097	453.41
50210:GFP-3	HoArg	7	207.093	557.995
50210:GFP-3	HoArg	7	196.601	499.37	210.263	532.858	15.4933	72.5121
50210:GFP-3	HoArg	7	253.193	620.657
Col-0	ctrl	7	19.6579	15.4011
Col-0	ctrl	7	18.5082	12.2022
Col-0	ctrl	7	21.4104	11.4837	19.8589	12.5191	1.46148	1.9848
Col-0	ctrl	7	17.5034	10.9894
Ko^3	ctrl	7	8.88281	2.26719
Ko^3	ctrl	7	8.91577	2.72493
Ko^3	ctrl	7	9.36607	2.49274	9.05488	2.94685	0.269998	0.922914
Ko^3	ctrl	7	8.95287	4.30255
50210:GFP-3	ctrl	7	24.4756	2.98349
50210:GFP-3	ctrl	7	21.7665	2.28744
50210:GFP-3	ctrl	7	19.5633	1.69038	21.9351	2.29817	2.46047	0.530296
50210:GFP-3	ctrl	7	22.4039	2.23135
Col-0	HoArg	10	157.353	807.402
Col-0	HoArg	10	122.426	1092.84
Col-0	HoArg	10	94.8788	1198.35	124.886	973.772	31.3098	203.071
Col-0	HoArg	10	104.767	796.503
Ko^3	HoArg	10	19.4915	671.128
Ko^3	HoArg	10	19.5898	838.429
Ko^3	HoArg	10	18.6778	1168.56	19.253	856.352	0.50059	219.09
Ko^3	HoArg	10	19.3143	747.285
50210:GFP-3	HoArg	10	440.99	828.136
50210:GFP-3	HoArg	10	426.174	659.069
50210:GFP-3	HoArg	10	424.713	700.576	430.625	734.638	9.0058	72.7391
50210:GFP-3	HoArg	10	435.279	750.771
Col-0	HoArg	14	636.799	961.103
Col-0	HoArg	14	177.168	776.385
Col-0	HoArg	14	145.305	821.791	157.759	830.635	17.0319	90.5222
Col-0	HoArg	14	150.804	763.259
Ko^3	HoArg	14	19.3109	457.768
Ko^3	HoArg	14	18.1489	534.884
Ko^3	HoArg	14	23.5214	584.933	20.3271	537.105	2.82674	56.9339
Ko^3	HoArg	14	23.1397	570.833
50210:GFP-3	HoArg	14	783.12	744.616
50210:GFP-3	HoArg	14	822.931	637.852
50210:GFP-3	HoArg	14	568.612	524.463	630.641	620.594	132.813	94.796
50210:GFP-3	HoArg	14	540.191	575.446
Col-0	HoArg	17	129.244	722.533
Col-0	HoArg	17	119.388	669.466
Col-0	HoArg	17	168.261	980.338	138.965	814.138	25.8459	143.591
Col-0	HoArg	17	159.871	884.216
Ko^3	HoArg	17	26.9696	1120.62
Ko^3	HoArg	17	27.657	1030.22
Ko^3	HoArg	17	24.8195	683.964	26.482	904.015	1.48027	205.215
Ko^3	HoArg	17	22.938	781.252
50210:GFP-3	HoArg	17	593.827	753.985
50210:GFP-3	HoArg	17	541.013	874.962
50210:GFP-3	HoArg	17	610.118	862.175	581.653	840.573	36.1251	57.9736
50210:GFP-3	HoArg	17	602.639	871.17
Col-0	ctrl	17	32.0519	14.9133
Col-0	ctrl	17	35.2314	16.6667
Col-0	ctrl	17	69.4354	16.0238	33.2841	15.0724	1.70609	1.74817
Col-0	ctrl	17	32.5691	12.6858
Ko^3	ctrl	17	11.7838	5.8409
Ko^3	ctrl	17	9.14046	3.88732
Ko^3	ctrl	17	11.2122	4.62889	10.7122	4.68155	1.39081	0.831721
Ko^3	ctrl	17	11.7369	4.36911
50210:GFP-3	ctrl	17	53.0425	4.24074
50210:GFP-3	ctrl	17	37.822	4.40839
50210:GFP-3	ctrl	17	51.8159	4.43868	47.5601	4.38976	8.45574	0.102603
50210:GFP-3	ctrl	17	39.5819	4.47121
