# Supplementary material for: Guanidine production by plant homoarginine-6-hydroxylases
Source: eLife. 2024 Apr 15;12:RP91458. doi: 10.7554/eLife.91458 (PMC11018352; doi:10.7554/eLife.91458)
Supplement: Figure 6—source data 1. [file elife-91458-fig6-data1.xlsx]

## Sheet: Chl
light samples harvested 23-03-23, 14:00												dark samples harvested 23-03-31, 14-16:00
sample	Fw	A665	A647	Chl a	Chl b	Chl	Chl/mg	Chl a/b	avg	stdev		sample	Fw	A664.5	A647	Chl a	Chl b	Chl	Chl a/b	Chl/mg	avg	stdev
KO^3-A1.1	9.4	0.286417	0.114533	3.31794	1.04759	4.57061	0.486235	3.1672				KO^3-A1.1	23.3	0.330483	0.1353	3.81965	1.27388	5.33012	2.99845	0.228761
KO^3-A1.2	9.5	0.266667	0.110233	3.07912	1.04983	4.31984	0.45472	2.93297			positions on deepwell plate exchanged	KO^3-A1.2	20.1	0.248133	0.103	2.86392	0.985724	4.02727	2.9054	0.200362
KO^3-A1.3	11.1	0.360967	0.144633	4.18075	1.32624	5.76544	0.519409	3.15232				KO^3-A1.3	17.2	0.194833	0.08235	2.24463	0.804515	3.1886	2.79004	0.185384
KO^3-A1.4	7.6	0.242167	0.0929333	2.81623	0.80491	3.79457	0.499286	3.49882	1.3099	0.0828049		KO^3-A1.4	17.5	0.196733	0.077	2.28368	0.684992	3.10955	3.33388	0.177689	0.565857	0.0824554
KO^3-A1.5	10.4	0.380267	0.141583	4.43437	1.17394	5.88069	0.565451	3.77733				KO^3-A1.5	18.6	0.242883	0.09255	2.8264	0.793664	3.79402	3.56121	0.203979
KO^3-A1.6	7.4	0.238767	0.0913333	2.77752	0.787498	3.73601	0.504867	3.52701				KO^3-A1.6	16.5	0.235733	0.092	2.73713	0.815312	3.72125	3.35716	0.225531
KO^3-A1.7	7.7	0.246017	0.0994333	2.84699	0.921673	3.9448	0.512312	3.08894				KO^3-A1.7	11.3	0.176783	0.0708	2.04762	0.648821	2.82301	3.1559	0.249824
KO^3-A1.8	10.6	0.326167	0.128733	3.78315	1.15789	5.17459	0.488169	3.26728				KO^3-A1.8	12	0.202733	0.08105	2.34858	0.741107	3.23485	3.16902	0.269571
KO^3-17.1	7	0.198267	0.0754333	2.30753	0.645478	3.095	0.442143	3.57491				KO^3-17.1	17.7	0.252783	0.0981	2.93665	0.862811	3.98048	3.40358	0.224886
KO^3-17.2	6.3	0.180667	0.0719333	2.09377	0.65434	2.87747	0.456742	3.19982				KO^3-17.2	17	0.245933	0.096	2.85551	0.850988	3.88261	3.35553	0.228389
KO^3-17.3	7.2	0.243117	0.0942833	2.82453	0.828466	3.8271	0.531541	3.40935				KO^3-17.3	15.1	0.156883	0.0626	1.81776	0.571019	2.50111	3.18337	0.165637
KO^3-17.4	6.1	0.141867	0.0541833	1.65054	0.466171	2.21831	0.363657	3.54062	1.14964	0.187404		KO^3-17.4	15.9	0.170283	0.0635	1.98543	0.527741	2.63514	3.76214	0.165732	0.578067	0.128432
KO^3-17.5	7.6	0.271467	0.100033	3.16853	0.816514	4.1795	0.549935	3.88056				KO^3-17.5	14.7	0.201983	0.0755	2.35454	0.629687	3.1289	3.73923	0.212851
KO^3-17.6	7.8	0.218617	0.0807333	2.55119	0.661171	3.36895	0.431917	3.85859				KO^3-17.6	15.1	0.195133	0.0713	2.27927	0.574394	2.99344	3.96812	0.198241
KO^3-17.7	9.1	0.241517	0.0935833	2.80616	0.821368	3.80049	0.417636	3.41645				KO^3-17.7	12.9	0.251133	0.09665	2.91974	0.840419	3.94001	3.47415	0.305427
KO^3-17.8	6.7	0.142467	0.0586333	1.64574	0.555514	2.30324	0.343768	2.96255				KO^3-17.8	10.9	0.194833	0.0732	2.27016	0.61511	3.02481	3.69065	0.277506
Col-0.1	10.9	0.381967	0.144083	4.44898	1.21784	5.9404	0.544991	3.65318				Col-0.1	19.1	0.268683	0.10425	3.12142	0.916658	4.23049	3.40522	0.221492
Col-0.2	10.3	0.273967	0.106683	3.18173	0.942619	4.32054	0.41947	3.37541				Col-0.2	19.6	0.287833	0.11	3.34858	0.94721	4.50193	3.53521	0.22969
Col-0.3	9.4	0.320117	0.119633	3.7317	0.997471	4.95846	0.527496	3.74117				Col-0.3	19.1	0.202183	0.084	2.33337	0.804713	3.28281	2.89963	0.171875
Col-0.4	8.8	0.236217	0.0883333	2.7535	0.737179	3.65987	0.415895	3.73519	1.25657	0.145713		Col-0.4	20.8	0.259983	0.0974	3.03004	0.815057	4.03131	3.71758	0.193813	0.572898	0.0949608
Col-0.5	8.6	0.278017	0.103683	3.24154	0.861808	4.30248	0.500288	3.76132				Col-0.5	22.5	0.339183	0.12605	3.95595	1.04221	5.24111	3.79574	0.232938
Col-0.6	9.8	0.267667	0.0997833	3.12097	0.828895	4.14159	0.422611	3.76522				Col-0.6	21.1	0.340033	0.1278	3.96186	1.07451	5.27991	3.68715	0.250233
Col-0.7	10	0.350667	0.130883	4.0883	1.0892	5.42868	0.542868	3.75347				Col-0.7	13.1	0.237783	0.08865	2.77251	0.736496	3.67933	3.76447	0.280865
Col-0.8	9.9	0.312917	0.118683	3.64292	1.01107	4.8781	0.492737	3.60303				Col-0.8	14.4	0.166183	0.0646	1.93029	0.569453	2.61875	3.38973	0.181858
argah1/2.1	9.9	0.332667	0.1292	3.8644	1.13752	5.24015	0.529308	3.39721				argah1/2.1	14.3	0.2144	0.0893	2.47373	0.857982	3.48519	2.8832	0.24372
argah1/2.2	6.8	0.195067	0.07995	2.25429	0.753757	3.14769	0.462896	2.99073				argah1/2.2	16.7	0.2489	0.10305	2.87352	0.983217	4.03491	2.92257	0.241612
argah1/2.3	8.2	0.302467	0.11745	3.51364	1.03382	4.76406	0.580983	3.3987				argah1/2.3	14.1	0.1768	0.07525	2.03541	0.740859	2.90282	2.74737	0.205873
argah1/2.4	6.5	0.193717	0.07645	2.24691	0.687544	3.07316	0.472794	3.26802	1.37933	0.146606		argah1/2.4	17.6	0.2257	0.08835	2.61989	0.786111	3.56762	3.33273	0.202706	0.717609	0.206106
argah1/2.5	5.4	0.189267	0.07305	2.19988	0.637723	2.97314	0.550582	3.44958				argah1/2.5	16.4	0.26745	0.1059	3.10115	0.956511	4.24917	3.24215	0.259096
argah1/2.6	7.5	0.227067	0.0852	2.64604	0.714592	3.52327	0.469769	3.70287				argah1/2.6	15.4	0.27795	0.1064	3.23311	0.918351	4.35052	3.52056	0.282501
argah1/2.7	8.4	0.302367	0.11775	3.51153	1.04049	4.76855	0.567685	3.37488				argah1/2.7	8.5	0.1709	0.07165	1.97053	0.693597	2.78646	2.84103	0.327818
argah1/2.8	6.2	0.238417	0.0941	2.76535	0.846385	3.78246	0.610074	3.26725				argah1/2.8	10	0.282	0.1098	3.27506	0.97002	4.44702	3.37628	0.444702
DIN11GFP.1	8.6	0.289417	0.10585	3.38027	0.85399	4.44158	0.516463	3.95821				DIN11GFP.1	16.1	0.2289	0.08765	2.66249	0.756837	3.58325	3.51791	0.222562
DIN11GFP.2	6.1	0.166167	0.06555	1.92743	0.589195	2.63561	0.432067	3.2713				DIN11GFP.2	11.2	0.0961	0.03815	1.11403	0.345723	1.52857	3.22232	0.136479
DIN11GFP.3	6.5	0.192017	0.0737	2.23299	0.638473	3.00898	0.462919	3.49739				DIN11GFP.3	12.3	0.1095	0.0453	1.26426	0.43182	1.77447	2.92775	0.144266
DIN11GFP.4	5.9	0.110167	0.0413	1.28389	0.34594	1.70874	0.289616	3.71131	1.20868	0.228087		DIN11GFP.4	12.9	0.1616	0.06135	1.88115	0.523353	2.52025	3.59443	0.195368	0.500526	0.0929745
DIN11GFP.5	8.1	0.292517	0.10545	3.42076	0.831388	4.4617	0.550827	4.11451				DIN11GFP.5	11.9	0.1686	0.06275	1.96615	0.519993	2.60691	3.7811	0.219068
DIN11GFP.6	7.8	0.215817	0.078	2.52325	0.617527	3.29539	0.422485	4.08606				DIN11GFP.6	14.7	0.1721	0.06255	2.01116	0.499683	2.63412	4.02486	0.179192
DIN11GFP.7	7.6	0.275117	0.1046	3.20215	0.894181	4.29337	0.564917	3.5811				DIN11GFP.7	8.7	0.1216	0.04825	1.4097	0.436983	1.93376	3.22599	0.222271
DIN11GFP.8	6	0.182967	0.07085	2.12601	0.621289	2.87832	0.47972	3.42193				DIN11GFP.8	7.8	0.1078	0.04325	1.24839	0.397239	1.72281	3.14267	0.220874
50:GFP-3.1	8.4	0.257467	0.0957	3.00282	0.791494	3.97874	0.473659	3.79387				50:GFP-3.1	17	0.2535	0.0993	2.9424	0.88434	4.00827	3.32723	0.235781
50:GFP-3.2	7.8	0.149967	0.05735	1.74457	0.494299	2.34627	0.300804	3.52938				50:GFP-3.2	16.5	0.23525	0.095	2.72262	0.879645	3.7707	3.09514	0.228527
50:GFP-3.3	4.5	0.159017	0.058	1.85769	0.465943	2.43755	0.541677	3.98695				50:GFP-3.3	17.6	0.176	0.0658	2.05162	0.54894	2.72662	3.73742	0.154922
50:GFP-3.4	6.8	0.179017	0.06585	2.08979	0.536038	2.75406	0.405009	3.89859	1.21865	0.244017		50:GFP-3.4	13.8	0.1595	0.05885	1.86146	0.481305	2.45702	3.86752	0.178045	0.585903	0.120003
50:GFP-3.5	8.4	0.328717	0.11995	3.84004	0.964294	5.03981	0.599978	3.98223				50:GFP-3.5	16.1	0.23775	0.08785	2.77432	0.72009	3.66471	3.85275	0.227622
50:GFP-3.6	6.8	0.187917	0.0703	2.1904	0.587035	2.91204	0.428241	3.7313				50:GFP-3.6	11.1	0.15125	0.0543	1.76938	0.425235	2.30297	4.16094	0.207475
50:GFP-3.7	6.3	0.220067	0.08195	2.56621	0.679657	3.40349	0.540237	3.77574				50:GFP-3.7	9.7	0.17425	0.06495	2.03176	0.53943	2.696	3.7665	0.277939
50:GFP-3.8	7	0.207617	0.07785	2.41953	0.652306	3.22054	0.460077	3.7092				50:GFP-3.8	10.2	0.19295	0.0718	2.25014	0.594831	2.98318	3.78283	0.292469

## Sheet: Gd MeJA
Plant	plate	time/d	Gd (µM)		Gd (µM)
Col-0	MeJA	4	31.757					Gd	ctrl	10 µM MeJA
Col-0	MeJA	4	18.8707					Col-0	17.5741	289.254	1.18416	40.6952
Col-0	MeJA	4	16.5498		17.5741	1.18416		din11-1	15.0123	21.4409	0.315677	1.5683
Col-0	MeJA	4	17.3017					din11-2	11.5219	14.0555	0.476965	1.45217
din11-2	MeJA	4	15.1412					triple-KO-1	10.7044	12.0239	0.683895	1.21533
din11-2	MeJA	4	14.6573					triple-KO-2	11.4363	11.231	0.960586	0.834903
din11-2	MeJA	4	15.381		15.0123	0.315677
din11-2	MeJA	4	14.8697
din11-1	MeJA	4	11.3163
din11-1	MeJA	4	12.0672
din11-1	MeJA	4	11.4315		11.5219	0.476965
din11-1	MeJA	4	11.1823
triple-KO-1	MeJA	4	10.0323
triple-KO-1	MeJA	4	10.9911
triple-KO-1	MeJA	4	10.2666		10.7044	0.683895
triple-KO-1	MeJA	4	11.5275
triple-KO-2	MeJA	4	12.2556
triple-KO-2	MeJA	4	10.8159
triple-KO-2	MeJA	4	12.2568		11.4363	0.960586
triple-KO-2	MeJA	4	10.4171
Col-0	ctrl	4	258.489
Col-0	ctrl	4	320.628
Col-0	ctrl	4	327.918		289.254	40.6952
Col-0	ctrl	4	249.978
din11-2	ctrl	4	21.8658
din11-2	ctrl	4	20.046
din11-2	ctrl	4	23.4721		21.4409	1.5683
din11-2	ctrl	4	20.3795
din11-1	ctrl	4	14.5401
din11-1	ctrl	4	14.348
din11-1	ctrl	4	11.9781		14.0555	1.45217
din11-1	ctrl	4	15.3556
triple-KO-1	ctrl	4	13.8245
triple-KO-1	ctrl	4	11.6925
triple-KO-1	ctrl	4	11.2848		12.0239	1.21533
triple-KO-1	ctrl	4	11.294
triple-KO-2	ctrl	4	11.5053
triple-KO-2	ctrl	4	10.2825
triple-KO-2	ctrl	4	10.9015		11.231	0.834903
triple-KO-2	ctrl	4	12.2348
