# Supplementary material for: Guanidine production by plant homoarginine-6-hydroxylases
Source: eLife. 2024 Apr 15;12:RP91458. doi: 10.7554/eLife.91458 (PMC11018352; doi:10.7554/eLife.91458)
Supplement: Figure 7—figure supplement 1—source data 1. [file elife-91458-fig7-figsupp1-data1.xlsx]

## Sheet: Tabelle1
Source Data Figure 7 Supplement 1
NAD+-dependent AASA-DH activity of ALDH7B4, AASA/P6C fixed at 1 mM
	AASA/P6C
c NAD+	nmol s-1 mg-1	SE	N
0.15	173.897	2.0472	3
0.2	220.592	1.88106	3
0.25	258.483	6.88825	3
0.35	315.817	8.51976	3
0.5	383.382	8.33956	3
0.8	440.054	7.88927	3
1.2	472.285	5.2527	3
2	502.152	5.63235	3
NADP+-dependent AASA-DH activity of ALDH7B4, NADP+ and AASA/P6C fixed at 1 mM
amount	0.64 g	1.28 g	2.56 g	5.12 g
Time (min)	nmol NADP+ reduced					amount	nmol s-1
0.5	0.931677	0.931677	1.24224	1.55279		0.64	0.006171
1	0.931677	1.24224	1.86335	2.48447		1.28	0.00851
2	1.86335	2.17391	3.10559	4.34783		1.92	0.010198
3	2.48447	2.79503	3.72671	4.96894		2.56	0.011173
4	2.79503	3.72671	4.65838	6.21118		3.2	0.012115
5	3.10559	4.03727	5.2795	6.8323		3.84	0.012245
6	3.41615	4.34783	5.90062	7.76398		4.48	0.013089
7	3.72671	4.65838	6.52174	8.38509		5.12	0.013674
8	4.03727	5.2795	7.14286	8.69565
9	4.34783	5.59006	7.45342	9.31677
10	4.34783	5.90062	7.76398	9.62733
12	4.96894	6.52174	8.69565	10.2485
14	5.59006	6.8323	9.31677	10.559
16	5.90062	7.45342	9.62733	11.1801
18	6.21118	7.76398	9.93789	11.4907
20	6.52174	8.07453	10.2485	11.4907
NAD+-dependent GSA-DH activity of ALDH7B4, NAD+ fixed at 1 mM and D,L-GSA/P5C fixed at 2 mM
amount	0.64 g	1.28 g	2.56 g	5.12 g
Time (min)	nmol NAD+ reduced					amount	nmol s-1
0.5	0	0.918695	0.918695	1.83739		0.64	0.014062
1	0.918695	3.67478	2.75609	3.67478		1.28	0.019999
2	2.75609	5.51217	5.51217	6.43087		1.92	0.026311
3	4.59348	7.34956	7.34956	9.18695		2.56	0.030373
4	6.43087	9.18695	10.1057	11.943		3.2	0.035498
5	8.26826	10.1057	11.943	14.6991		3.84	0.039373
6	8.26826	11.0244	12.8617	17.4552		4.48	0.041904
7	8.26826	11.943	14.6991	20.2113		5.12	0.043154
8	10.1057	13.7804	17.4552	22.9674
9	11.0244	14.6991	19.2926	25.7235
10	11.0244	14.6991	20.2113	27.5609
12	12.8617	18.3739	23.8861	33.073
14	16.5365	22.0487	28.4796	39.5039
16	14.6991	22.9674	31.2356	43.1787
18	17.4552	24.8048	34.9104	47.7722
20	17.4552	26.6422	37.6665	52.3656
