# Supplementary material for: Guanidine production by plant homoarginine-6-hydroxylases
Source: eLife. 2024 Apr 15;12:RP91458. doi: 10.7554/eLife.91458 (PMC11018352; doi:10.7554/eLife.91458)
Supplement: Figure 7—source data 1. [file elife-91458-fig7-data1.xlsx]

## Sheet: Tabelle1
Source data Figure 7
AASA-DH activity of OsP5CR, AASA/P6C fixed at 1 mM
	NADH			NADPH
c AASA/P6C	nmol s-1 mg-1	SE	N	nmol s-1 mg-1	SE	N
0.2	3.74768	0.255137	6
0.24	4.76458	0.099218	6				excluded
0.3	4.57622	0.145996	6
0.4	5.24456	0.180712	6
0.7	5.7698	0.185926	6
1	6.36	0.233453	6
1.4	6.43435	0.131712	6
2	6.52158	0.149715	6
0.2				6.73178	0.375122	6	excluded
0.3				7.02373	0.352399	6
0.4				7.90137	0.201	6
0.7				9.01356	0.240197	6
1				10.12	0.107238	6
1.4				11.1385	0.26664	6
2				11.42	0.363548	6
3				11.7465	0.364552	6
AASA-DH activity of ALDH7B4, NAD+ fixed at 1 mM
	NAD
c AASA/P6C	nmol s-1 mg-1	SE	N
0.03	360.19	5.98184	3
0.04	409.536	7.38928	3
0.05	425.51	6.23179	3
0.07	465.009	8.54339	3
0.1	469.065	5.08047	3
0.15	490.51	7.73967	3
0.2	498.648	7.90394	3
0.3	504.067	5.21338	3
