# Supplementary material for: Guanidine production by plant homoarginine-6-hydroxylases
Source: eLife. 2024 Apr 15;12:RP91458. doi: 10.7554/eLife.91458 (PMC11018352; doi:10.7554/eLife.91458)
Supplement: Source data 1. [file elife-91458-data1.xlsx]

## Sheet: Din11s
Summary of kinetic characterisations of Din11s
date	220711	220804	220811	220831		average	SD
Amax (HoArg)	12.1	17.82	13.27	10.4		13.3975	3.17507
KM (HoArg)	2.368	1.707	1.681	1.775		1.88275	0.325919
SE KM	0.2716	0.1802	0.1541	0.1002
SE Amax	0.1612	0.06554	0.07451	0.06656
date						average	SD
Amax (Arg)	2.338	4.985	3.25	1.904		3.11925	1.36447
KM (Arg)	1.316	12.63	7.475	2.713		6.0335	5.12745
SE KM	0.1893	0.3753	0.1976	0.07318
SE Amax	0.7346	2.774	1.519	0.4554
date						average	SD
Amax (HoArg + Arg)	11.11	17.21	14.14	9.324		12.946	3.46877
KM (HoArg + Arg)	4.15	3.198	3.78	3.11		3.5595	0.493303
SE KM	1.029	0.5982	0.369	0.3223
SE Amax	0.9683	0.3467	0.2917	0.3421
date						average	SD
Amax (HoArg + Can)	9.133	14.55	12.24	8.76		11.1707	2.74024
KM (HoArg + Can)	6.54	4.635	4.676	5.964		5.45375	0.95141
SE KM	1.043	0.4569	0.3781	0.4511
SE Amax	1.62	0.4032	0.3989	0.7675
date	220503	220519	220525	220614	220805	220812	220831		average	SD
Amax (2-OG)	6.414	5.519	17.46	7.763	4.19	4.601	5.39		5.2228	0.864286
KM (2-OG)	0.02004	0.03401	0.04676	0.02801	0.03269	0.04265	0.02152		0.030182	0.00941123
KI (2-OG)	8.45	69.43	28.07	27.68	150.8	9.704	14.08		17.5968	9.61362
SE KM	0.349	0.2439	0.8327	0.22	0.2493	0.2006	0.2351
SE Amax	0.004712	0.006512	0.008681	0.00329	0.00983	0.006691	0.003832
SE KI	2.148	48.53	10.24	6.398	161	2.623	3.898

## Sheet: At3g49630
Summary of kinetic characterisations of At3g49630
date	220715	220825	220915		average	SD
Amax	6.755	4.309	5.863		5.64233	1.23784
KM (HoArg)	4.363	4.529	4.795		4.56233	0.21792
SE KM	0.48	0.171	0.2015
SE Amax	0.8758	0.4979	0.4468
date					average
Amax (HoArg + Arg)	6.344	3.963	5.953		5.42	1.27685
KM (HoArg + Arg)	3.617	3.778	5.006		4.13367	0.75974
SE KM	0.3183	0.2146	0.1801
SE Amax	0.5538	0.6061	0.4042
date					average
Amax (HoArg + Can)	6.601	3.83	5.848		5.42633	1.43282
KM (HoArg + Can)	3.82	3.684	4.945		4.14967	0.692127
SE KM	1.207	0.1274	0.09347
SE Amax	2.059	0.3663	0.2119
date	220511	220718	220825	220915	220920		average
Amax (2-OGn)	2.806	0.9437	2.998	5.306	3.515		3.10633	0.365574
KM (2-OG)	0.007367	0.02702	0.02	0.09874	0.06927		0.0537575	0.0370519
KI (2-OG)	45.43	1.554	27.76		37.29		36.8267	8.84411
SE KM	0.102	0.193	0.1625	1.054	0.1975
SE Amax	0.002	0.01361	0.004938	0.05342	0.01529
SE KI	23.08	1.248	11.97		9.901

## Sheet: At3g50210
Summary of kinetic characterisations of At3g50210
date	220815	220819	220913		average	SD
Amax (HoArg)	19.31	20.66	22.72		20.8967	1.71727
KM (HoArg)	0.9174	0.6265	0.7847		0.7762	0.145636
SE KM	0.875	0.2933	0.3279
SE Amax	0.1806	0.04828	0.05156
date
Amax (HoArg + Arg)	17.65	21.15	25.01		21.27	3.68147
KM (HoArg + Arg)	1.52	1.491	2.248		1.753	0.428928
SE KM	0.8667	0.3162	0.4014
SE Amax	0.2748	0.09281	0.1319
date
Amax (HoArg + Can)	13.94	16.12	18.45		16.17	2.25542
KM (HoArg + Can)	0.7181	0.6622	0.8411		0.740467	0.0915232
SE KM	0.5799	0.3401	0.6651
SE Amax	0.1401	0.07464	0.1355
date	220819	220913	230414
Amax (2-OGn)	16.99	27.08	17.58		20.55	5.66283
KM (2-OG)	0.05848	0.09646	0.07908		0.0780067	0.0190127
KI (2-OG)	49.1	45.47	40.02		44.8633	4.5703
SE KM	0.2966	0.7001	0.5306
SE Amax	0.004936	0.01054	0.01001
SE KI	4.84	5.836	5.332
